# Supplementary material for: General strategy for ATiO3 (A = Ca, Sr, or Ba) submicrospheres with large surface area and its photocatalytic applications
Source: Royal Society of Chemistry journal article supplement (doi:10.1039/d2ce00875k), 2022-01-01
Supplement: d2ce00875k1.pdf [file d2ce00875k1.pdf]

# **General Strategy for $\text{ATiO}_3$ (A = Ca, Sr, or Ba) Submicrospheres with Large Surface Area and its Photocatalytic Applications**

Ping Wang<sup>a,#</sup>, Miao Hou<sup>a,#</sup>, Wenli Song<sup>a</sup>, Wenli Zhou<sup>a,b</sup>, Jinlin Zhang<sup>a,b</sup>,  
Liping Yu<sup>a,c,\*</sup>, Chengzhi Li<sup>a</sup>, Shixun Lian<sup>a,b,\*</sup>

<sup>a</sup>Key Laboratory of Light Energy Conversion Materials of Hunan Province College,  
College of Chemistry and Chemical Engineering, Hunan Normal University, Changsha  
410081, China

<sup>b</sup>Key Laboratory of Chemical Biology and Traditional Chinese Medicine Research  
(Ministry of Education), College of Chemistry and Chemical Engineering, Hunan  
Normal University, Changsha, 410081, China

<sup>c</sup>National & Local Engineering Laboratory for New Petro-chemicals Materials and Fine  
Utilization of Resource, College of Chemistry and Chemical Engineering, Hunan  
Normal University, Changsha 410081, China

<sup>#</sup>Ping Wang and Miao Hou have contributed equally.

\*Corresponding author: Liping Yu and Shixun Lian

Fax: 86-731-88865345 Tel: 86-731-88865345

E-mails: lpyu@hunnu.edu.cn; sxlian@hunnu.edu.cn

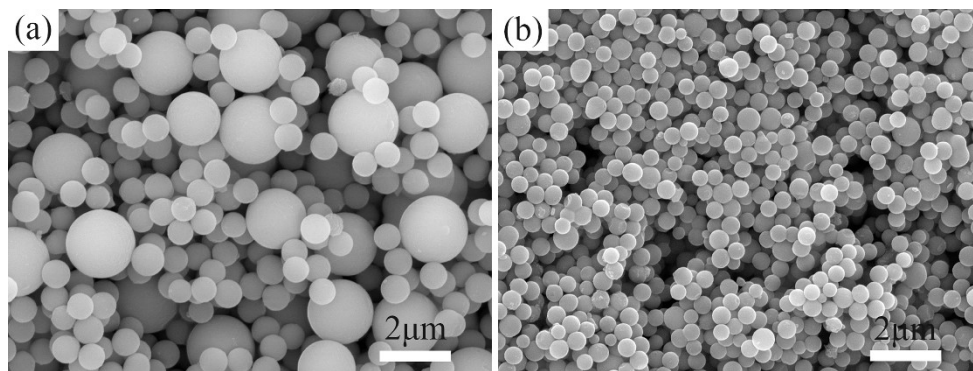

Figure S1. SEM micrographs of AHTS synthesized by process F (a) and process E (b).

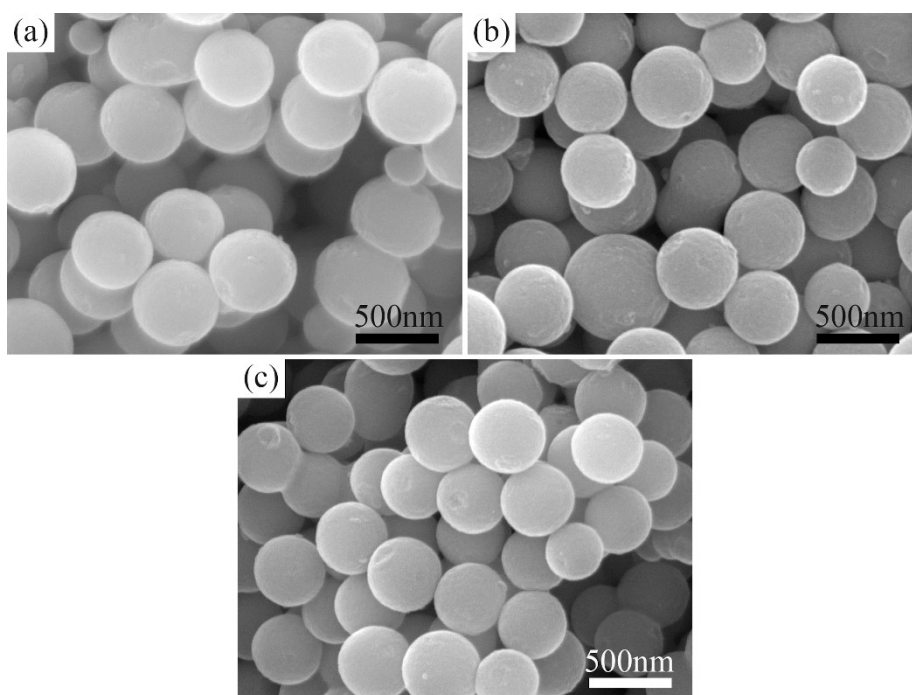

Figure S2. SEM micrographs of as-prepared precursor under different  $R_V$  of (a) 3:1, (b) 4:1, and (c)

5:1.

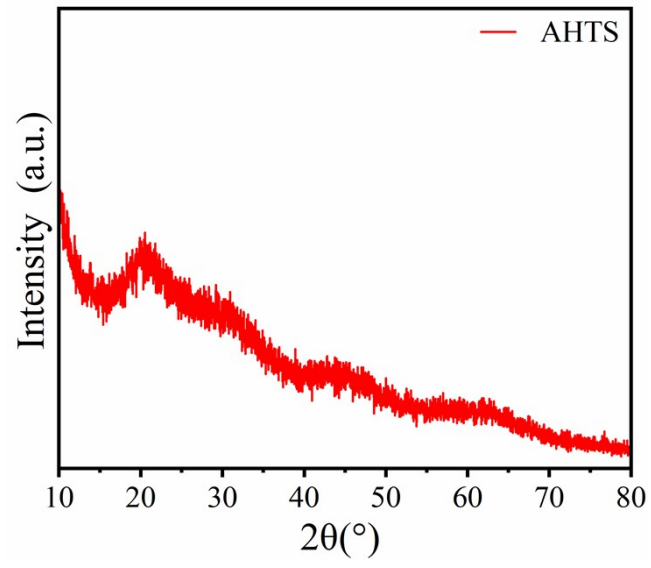

Figure S3. XRD pattern of AHTS

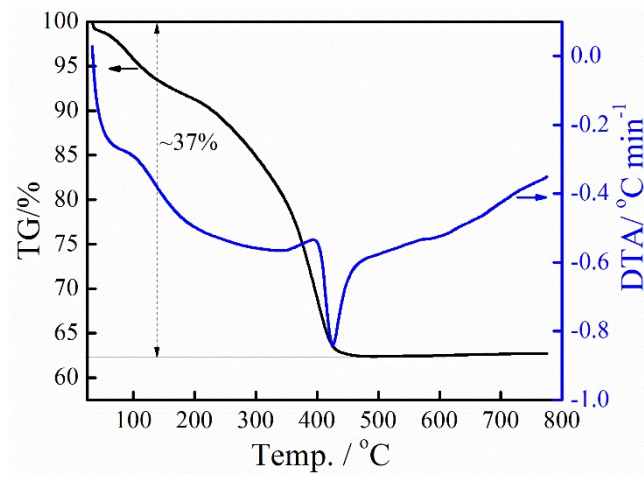

Figure S4. TG and DTA curves of the precursor.

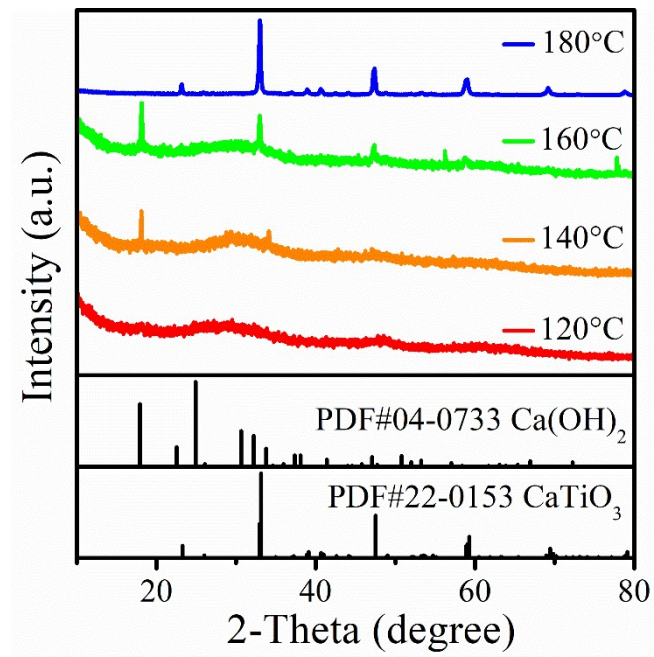

Figure S5 XRD patterns of  $\text{CaTiO}_3$  synthesized at (a) 120°C, (b) 140°C, (c) 160°C, and (d) 180°C for 4.0 h.

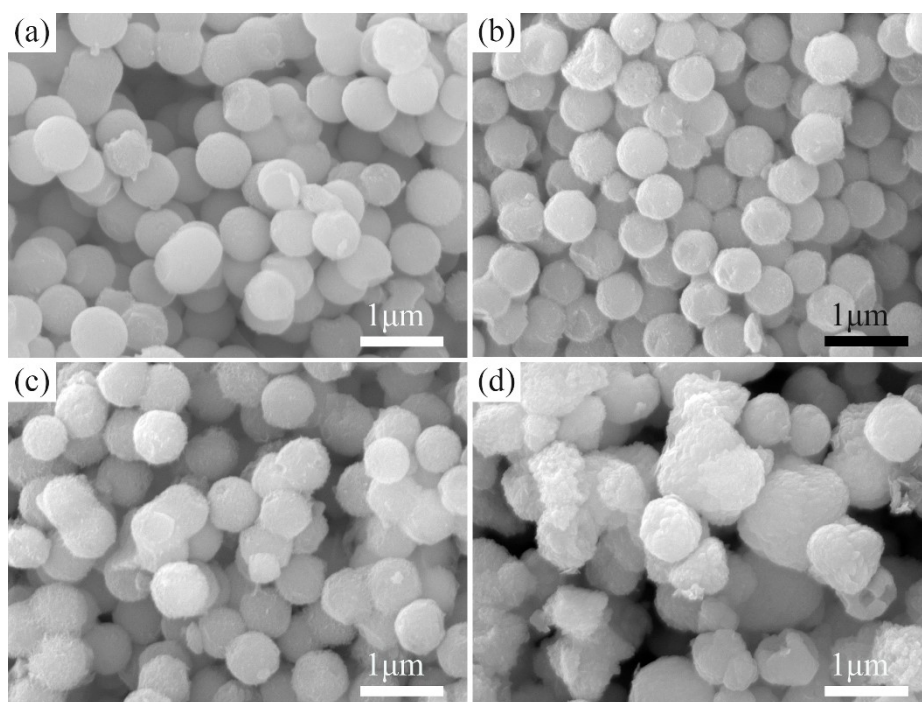

Figure S6. SEM micrographs of  $\text{CaTiO}_3$  synthesized at (a)  $120^\circ\text{C}$ , (b)  $140^\circ\text{C}$ , (c)  $160^\circ\text{C}$ , and (d)  $180^\circ\text{C}$  for 4.0 h.

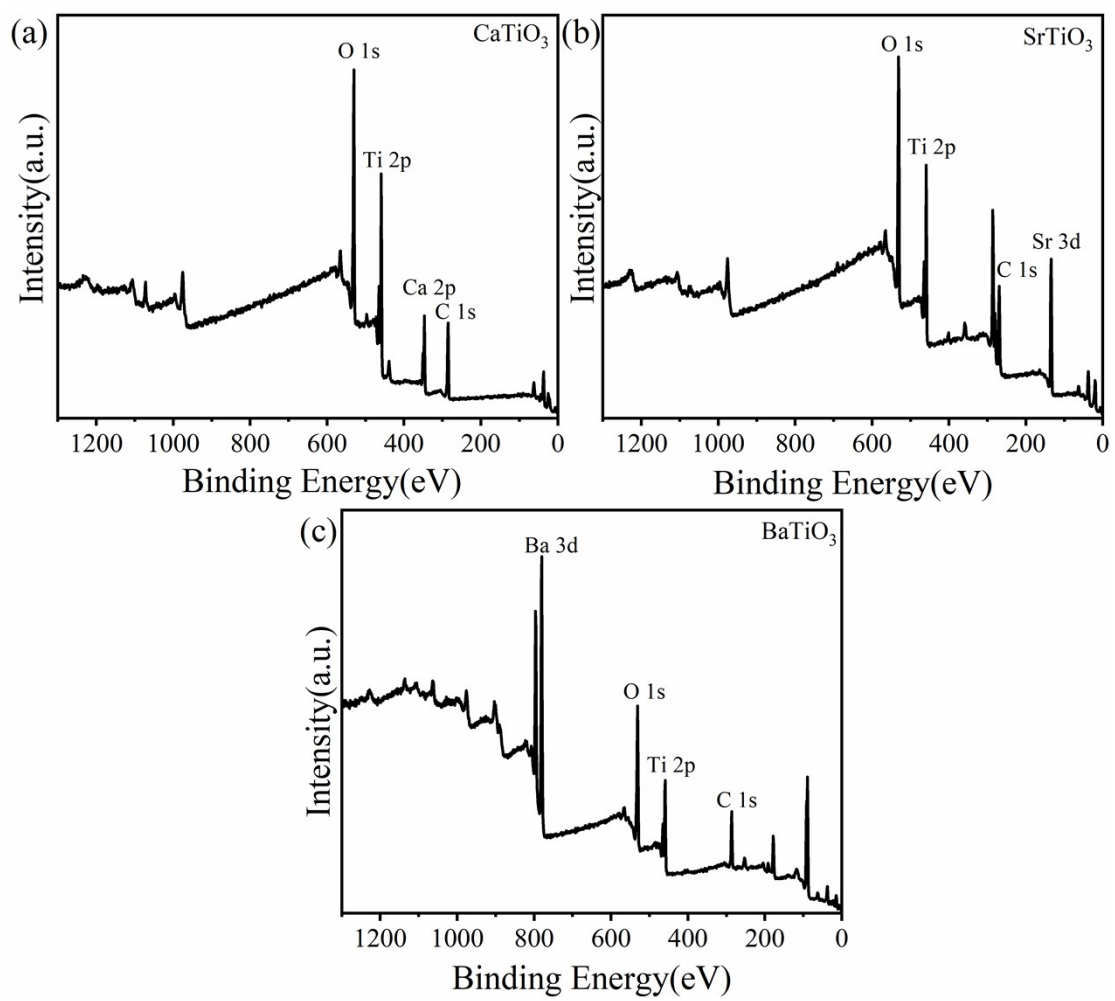

Figure S7. XPS full spectra of (a)  $\text{CaTiO}_3$ , (b)  $\text{SrTiO}_3$ , and (c)  $\text{BaTiO}_3$ .
